# Supplementary material
Source: PubMed Central journal article supplement (PMC3569027)
Supplement: NIHMS394565-supplement-Suppl__Material.pdf [file NIHMS394565-supplement-Suppl__Material.pdf]

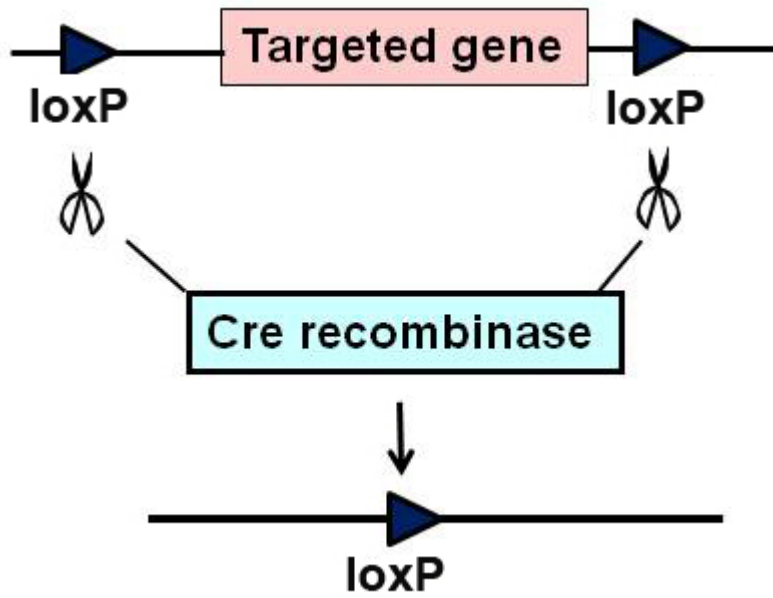

**Supplementary Figure 1. Illustration of the Cre/loxP system.** The targeted sequence is flanked by two loxP sites. When Cre recombinase is present, two loxP sites recombine, causing the deletion of the sequence flanked by them.

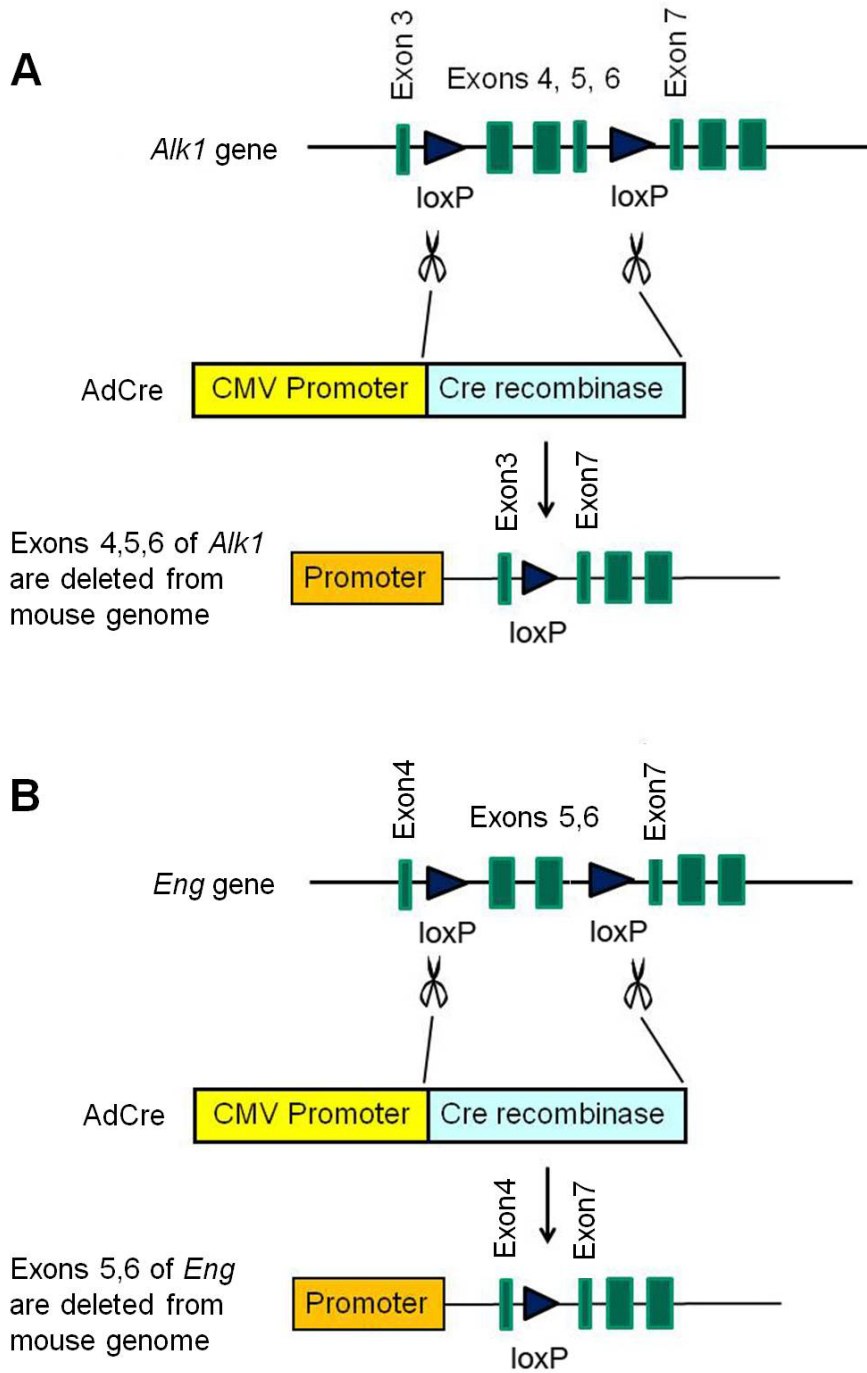

**Supplementary Figure 2. Ad-Cre-mediated deletion of loxP-flanked sequences in *Alk1*<sup>2f/2f</sup> or *Eng*<sup>2f/2f</sup> mice.** **A.** In *Alk1*<sup>2f/2f</sup> mice, exons 4 to 6 of *Alk1* on both alleles are flanked by loxP sequences. Injection of Ad-Cre into the basal ganglia of *Alk1*<sup>2f/2f</sup> mice results in deletion of the loxP-flanked exons 4 to 6 of the *Alk1* gene. **B.** In *Eng*<sup>2f/2f</sup> mice, exons 5 and 6 are deleted by the same method.

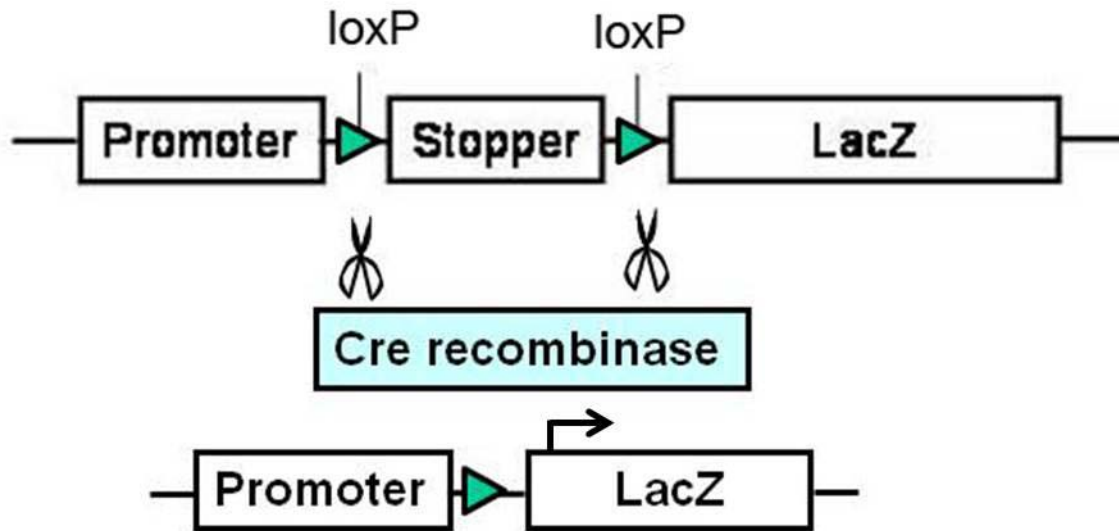

**Supplementary Figure 3. Scheme of monitoring the efficiency of Cre-mediated recombination of loxP sites using R26R mice.** R26R mice carry a transgene in which expression of the reporter *lacZ* gene is activated when the stopper flanked by loxP sites is removed by Cre-mediated recombination.
